# Supplementary material for: Munc18-1 is a dynamically regulated PKC target during short-term enhancement of transmitter release
Source: eLife. 2014 Feb 11;3:e01715. doi: 10.7554/eLife.01715 (PMC3919271; doi:10.7554/eLife.01715)
Supplement: Figure 1—source data 1. — (A) Data values and statistics underlying Figure 1B. (B) Data values and statistics underlying Figure 1C. (C) Data values and statistics underlying Figure 1F. (D) Data values and statistics underlying Figure 1G. DOI: http://dx.doi.org/10.7554/eLife.01715.004 [file elife01715s001.xlsx]

## Sheet: A
Data point	PTP decay rate (%/min) in control	PTP decay rate (%/min) in Calyculin
1	14.32	5.54
2	13.14	1.22
3	28.98	0.89
4	9.56	-0.33
5	20.89	12.08
6	11.03	7.73
7	13.84	1.12
Summary
Average	15.97	4.04
SEM	2.76	1.87
N=	7	7
Statistical test	paired two-tailed t-test, p=0.00655
Figure 1-Source data 1A. Data values and statistics underlying Figure 1B

## Sheet: B
Data point	Baseline EPSC amplitude (nA) in control	Baseline EPSC amplitude (nA) in Calyculin
1	3.47	3.25
2	3.57	3.41
3	4.11	4.44
4	3.09	2.52
5	3.38	4.06
6	5.53	5.69
7	3.56	3.28
Summary
Average	3.82	3.81
SEM	0.33	0.42
N=	7	7
Statistical test	paired two-tailed t-test, p=0.959
Figure 1-Source data 1B. Data values and statistics underlying Figure 1C

## Sheet: C
Data point	mEPSC amplitude (pA) before HFS in control	mEPSC amplitude (pA) after HFS in control	mEPSC amplitude (pA) before HFS in calyculin	mEPSC amplitude (pA) after HFS in calyculin
1	37.75	43.58	45.05	47.93
2	28.07	32.63	33.07	34.6
3	32.69	41.18	38.44	44.07
4	22.95	25.93	32.28	29.99
5	31.64	46.88	37.43	48.52
Summary
Average	30.62	38.04	37.254	41.022
SEM	2.76	4.29	2.55516	4.15465
N=	5	5	5	5
Statistical test	paired two-tailed t-test, p=0.0261		paired two-tailed t-test, p=0.1665
Figure 1-Source data 1C. Data values and statistics underlying Figure 1F

## Sheet: D
Data point	Steady state mEPSC frequency (Hz) in control	Steady state mEPSC frequency (Hz) in calyculin
1	1.08	2.3
2	0.68	1.94
3	0.47	1.38
4	0.4	1.21
5	0.17	1.71
Summary
Average	0.56	1.708
SEM	0.171501	0.217928
N=	5	5
Statistical test	paired two-tailed t-test, p=0.00093
Figure 1-Source data 1D. Data values and statistics underlying Figure 1G
