# Supplementary material for: Munc18-1 is a dynamically regulated PKC target during short-term enhancement of transmitter release
Source: eLife. 2014 Feb 11;3:e01715. doi: 10.7554/eLife.01715 (PMC3919271; doi:10.7554/eLife.01715)
Supplement: Figure 2—source data 1. — (A) Data values and statistics underlying Figure 2B. (B) Data values and statistics underlying Figure 2C. (C) Data values and statistics underlying Figure 2F. (D) Data values and statistics underlying Figure 2—figure supplement 1. DOI: http://dx.doi.org/10.7554/eLife.01715.006 [file elife01715s002.xlsx]

## Sheet: A
Data point	PTP (%) in PKAi treated synapses	PTP (%) in PKCi treated synapses
1	159.2	132.9
2	248.2	154.5
3	190.8	104.2
4	182.1	147.9
5	187	147.6
6	277.4	138.9
7	191.9	133.9
8	247.1	96.3
9	218.1
Summary
Average	211.3	132
SEM	13.7	8
N=	9	8
Statistical test	unpaired two-tailed t-test, p=0.000154
Figure 2-Source data 1A. Data values and statistics underlying Figure 2B

## Sheet: B
Data point	Baseline EPSC (nA) in PKAi treated synapses	Baseline EPSC (nA) in PKCi treated synapses
1	11.61	6.02
2	5.04	10.28
3	1.9	4.96
4	6.03	2.51
5	8.1	5.07
6	2.65	6.92
7	6.42	2.85
8	2.51	5.1
9	6.1
Summary
Average	5.59	5.46
SEM	1.09	0.92
N=	9	8
Statistical test	unpaired two-tailed t-test, p=0.924
Figure 2-Source data 1B. Data values and statistics underlying Figure 2C

## Sheet: C
Data point	PTP (%) in control	PTP (%) in U73122 treated synapses
1	179.9	158.6
2	222.7	147.5
3	162.6	196.2
4	164.6	154.9
5	205.3	155.5
6	220.6	370.2
7	415.5	253.4
8		165.6
9		169.5
10		188.4
Summary
Average	224.5	196
SEM	35.8	22.9
N=	7	10
Statistical test	unpaired two-tailed t-test, p=0.488
Figure 2-Source data 1C. Data values and statistics underlying Figure 2F

## Sheet: Figure 2-suppl. 1-source data 1
Data point	mEPSC amplitude (pA) before HFS in PKAi	mEPSC amplitude (pA) after HFS in PKAi	mEPSC amplitude (pA) before HFS in PKCi	mEPSC amplitude (pA) after HFS in PKCi
1	45.32	70.36	24.93	31.36
2	37.54	31.74	33	30.12
3	26.51	32.93	40.64	37.08
4	37.57	38.31	47.87	51.677
5	33.71	31.63	25.65	32.916
6	31.817	34.63	30.01	29.22
7			66.53	66.73
8			31.22	40.21
Summary
Average	35.4112	39.9333	37.4813	39.9141
SEM	2.84549	6.75771	5.29603	4.94462
N=	6	6	8	8
Statistical test	paired two-tailed t-test, p=0.3553		paired two-tailed t-test, p=0.1979
Data point	mEPSC amplitude (pA) before HFS in control	mEPSC amplitude (pA) after HFS in control	mEPSC amplitude (pA) before HFS in U73122	mEPSC amplitude (pA) after HFS in U73122
1	38	36.7	29.9	30.5
2	30.8	33.1	32.16	44.5
3	22.8	25	37.35	38.95
4	31.6	37.4	35.9	40.38
5			27.59	27.65
Summary
Average	30.8	33.05	32.58	36.396
SEM	3.59753	3.2838	2.03154	3.52956
N=	4	4	5	5
Statistical test	paired two-tailed t-test, p=0.218		paired two-tailed t-test, p=0.167
Figure 2-Source data 1D. Data values and statistics underlying Figure 2-figure supplement 1
