# Supplementary material for: Munc18-1 is a dynamically regulated PKC target during short-term enhancement of transmitter release
Source: eLife. 2014 Feb 11;3:e01715. doi: 10.7554/eLife.01715 (PMC3919271; doi:10.7554/eLife.01715)
Supplement: Figure 3—source data 1. — (A) Data values and statistics underlying Figure 3C. (B) Data values and statistics underlying Figure 3D. DOI: http://dx.doi.org/10.7554/eLife.01715.010 [file elife01715s003.xlsx]

## Sheet: A
Data point	EPSC peak (nA) in synapses expressing GFP only	EPSC peak (nA) in synapses expressing GFP and Cre		EPSC peak (nA) in synapses expressing GFP, M18WT and Cre
1	12.03	0		12.73
2	9.49	0		8.19
3	11.95	0.294		7.01
4		0.02		0.06
5		0.06		5.38
6		1.13
Summary
Average	11.16	0.251		6.67
SEM	1.02	0.199		2.3
N=	3	6		5
Statistical test	unpaired two-tailed t-test
	p=0.0042		p=0.035
Figure 3-Source data 1A. Data values and statistics underlying Figure 3C

## Sheet: B
Data point	Pulse ICa (nA) in synapses expressing GFP only	Pulse ICa (nA) in synapses expressing GFP and Cre		Pulse ICa (nA) in synapses expressing GFP, M18WT and Cre
1	0.95	0.71		1.07
2	1.17	0.69		0.79
3	1.11	0.91		0.84
4		1.2		1
5		1.87		0.67
6		1.04
Summary
Average	1.08	1.07		0.87
SEM	0.08	0.2		0.08
N=	3	6		5
Statistical test	unpaired two-tailed t-test
	p=0.971		p=0.344
Figure 3-Source data 1B. Data values and statistics underlying Figure 3D
