# Supplementary material for: Munc18-1 is a dynamically regulated PKC target during short-term enhancement of transmitter release
Source: eLife. 2014 Feb 11;3:e01715. doi: 10.7554/eLife.01715 (PMC3919271; doi:10.7554/eLife.01715)
Supplement: Figure 4—source data 1. — (A) Data values and statistics underlying Figure 4E. (B) Data values and statistics underlying Figure 4F. (C) Data values and statistics underlying Figure 4—figure supplement 1. (D) Data values and statistics underlying Figure 4—figure supplement 2. DOI: http://dx.doi.org/10.7554/eLife.01715.014 [file elife01715s004.xlsx]

## Sheet: A
Data point	Baseline EPSC amplitude (nA) in M18WT rescue	Baseline EPSC amplitude (nA) in M18SA rescue
1	4.62	7.23
2	0.91	1.86
3	1.59	6.14
4	0.99	0.77
5	6.23	1.13
6	3.82	2.1
7	6.64	3.2
8	1.69	1.8
9	3.51	4.04
10	2.03	1.78
11	1.04	1.45
12	1.83	0.75
13		1.64
14		6.87
15		2.21
Summary
Average	2.91	2.87
SEM	0.61	0.59
N=	12	15
Statistical test	unpaired two-tailed t-test, p=0.956
Figure 4-Source data 1A. Data values and statistics underlying Figure 4E

## Sheet: B
Data point	PTP (%) in M18WT rescue	PTP (%) in M18SA rescue
1	169.8	96.4
2	281.7	191.1
3	192.8	128.3
4	211.3	144.3
5	189.9	256.6
6	185.1	121.4
7	165.2	147.9
8	254.5	105.5
9	272.4	207.3
10	204.9	75.9
11	326	160.7
12	201.8	115.7
13		159.5
14		116.9
15		173.8
Summary
Average	221.3	146.7
SEM	15.2	12.6
N=	12	15
Statistical test	unpaired two-tailed t-test, p=0.000667
Figure 4-Source data 1B. Data values and statistics underlying Figure 4F

## Sheet: C
Data point	mEPSC amplitude (pA) before HFS in M18WT rescue	mEPSC amplitude (pA) after HFS in M18WT rescue	mEPSC amplitude (pA) before HFS in M18SA rescue	mEPSC amplitude (pA) after HFS in M18SA rescue
1	36.66	37.26	40.75	40.94
2	57.48	65.62	39.24	44.06
3	44.45	42.45	45.9	55.98
4	45.65	48.94	40.95	36.33
5	32.05	24.463	34.94	37.56
6	81.39	69.07	28.06	31.15
7	51.2	37.68	64.11	48.37
8	33.33	30.916
Summary
Average	47.7762	44.5499	41.9929	42.0557
SEM	6.11277	5.99076	4.59018	3.37864
N=	8	8	7	7
Statistical test	paired two-tailed t-test, p=0.2644		paired two-tailed t-test, p=0.9846
Figure 4-Source data 1C. Data values and statistics underlying Figure 4 supplementary figure 1

## Sheet: D
Data point	Paired pulse ratio of EPSC2/EPSC1 in M18WT rescue	Paired pulse ratio of EPSC2/EPSC1 in M18SD rescue	Baseline EPSC amplitude (nA) in M18WT rescue	Baseline EPSC amplitude (nA) in M18SD rescue
1	0.797428	0.577865	4.61617	2.18
2	0.63798	1.3117	0.914925	1.99
3	0.620602	0.860192	1.59491	1.96
4	0.836008	0.854045	0.99316	1.2
5	0.652863	0.757049	6.23425	1.21
6	0.487929	0.915321	3.82316	0.968
7	0.791862	0.35631	6.63838	1.84
8	0.798106	1.60381	1.69229	0.923
9	0.725797		3.51246
10	0.837542		2.03051
11	0.784422		1.04274
12	1.57473		1.83274
Summary
Average	0.795439	0.904537	2.91047	1.53388
SEM	0.0806	0.149	0.612182	0.192225
N=	12	8	12	8
Statistical test	unpaired two-tailed t-test, p=0.5074		unpaired two-tailed t-test, p=0.0428
Figure 4-Source data 1D. Data values and statistics underlying Figure 4 supplementary figure 2
