# Supplementary material for: Munc18-1 is a dynamically regulated PKC target during short-term enhancement of transmitter release
Source: eLife. 2014 Feb 11;3:e01715. doi: 10.7554/eLife.01715 (PMC3919271; doi:10.7554/eLife.01715)
Supplement: Figure 5—source data 1. — (A) Data values and statistics underlying Figure 5D. (B) Data values and statistics underlying Figure 5E. (C) Data values and statistics underlying Figure 5G. (D) Data values and statistics underlying Figure 5H. DOI: http://dx.doi.org/10.7554/eLife.01715.018 [file elife01715s005.xlsx]

## Sheet: A
Data point	EPSC potentiation by PDBu (%) in M18WT rescue	EPSC potentiation by PDBu (%) in M18SA rescue
1	243	165.2
2	159.3	174.4
3	253.8	136.1
4	158.5	147.3
5	170.3	184.5
6	231.1	114.8
7		177.8
Summary
Average	202.7	153.7
SEM	19.9	10.4
N=	6	7
Statistical test	unpaired homoscedastic two-tailed t-test, p=0.0414
Figure 5-Source data 1A. Data values and statistics underlying Figure 5D

## Sheet: B
Data point	Baseline EPSC (nA) in M18WT rescue	Baseline EPSC (nA) in M18SA rescue
1	2.76	0.82
2	5.18	9.38
3	2.12	7.8
4	3.74	1.74
5	6.23	1.84
6	1.55	5.9
7		1.21
Summary
Average	3.6	4.58
SEM	0.81	1.47
N=	6	7
Statistical test	unpaired two-tailed t-test, p=0.751
Figure 5-Source data 1B. Data values and statistics underlying Figure 5E

## Sheet: C
Data point	mEPSC frequency (Hz) before PDBu in M18WT rescue	mEPSC frequency (Hz) after PDBu in M18WT rescue	mEPSC frequency (Hz) before PDBu in M18SA rescue	mEPSC frequency (Hz) after PDBu in M18SA rescue
1	0.848485	3.95556	0.59596	1.92593
2	0.878788	4.42222	4.21212*	8.22222*
3	1.44444	5.91111	0.888889	3.48148
4	0.191919	1.37778	0.222222	0.641976
5	0.242424	1.06667	0.212121	0.472222
6	0.272727	1.56
Summary
Average	0.646464	3.04889	0.479798	1.6304
N=	5	5	4	4
Figure 5-Source data 1C. Data values and statistics underlying Figure 5G
* This outlying data set (measurement from one individual cell) was omitted in mean analysis due to its unusual high spontaneous release.

## Sheet: D
Data point	mEPSC frequency potentiation (%) by PDBu in M18WT rescue	mEPSC frequency potentiation (%) by PDBu in M18SA rescue
1	466.19	323.164
2	503.22	391.666
3	409.23	288.889
4	717.89	222.619
5	440
6	572
Summary
Average	518.09	306.58
SEM	50.47	40.66
N=	6	4
Statistical test	unpaired homoscedastic two-tailed t-test, p=0.011
Figure 5-Source data 1D. Data values and statistics underlying Figure 5H
